# Supplementary material
Source: publisher figshare collection journal article supplement (https://geolsoc.figshare.com/ndownloader/files/5424401)
Supplement: Supplementary file 1 [file 5424401]

LA-ICPMS data from sample F1108
								Corrected isotope ratios															Dates (Ma)											207-corrected		208-corrected			Concentrations (ppm)
		U	Th	Pb*		206Pb		208Pb*	�2s	206Pb*	�2s	207Pb*	�2s	206Pb*	�2s	error	238U	�2s	207Pb*	�2s	error		208Pb*	�2s	207Pb*	�2s	207Pb*	�2s	206Pb*	�2s		%		206Pb*	�2s	206Pb*	�2s
Analysis	Notes	ppm	ppm	ppm	Th/U	204Pb		232Th	(%)	207Pb*	(%)	235U*	(%)	238U	(%)	corr.	206Pb*	(%)	206Pb*	(%)	corr.		232Th	(Ma)	206Pb*	(Ma)	235U	(Ma)	238U*	(Ma)		disc.		238U*	(Ma)	238U*	(Ma)		P	Ti	Y	Zr	Nb	La	Ce	Pr	Nd	Sm	Eu
F1108 M 519 12/3/2013 10:35:30 AM (Run: 1)		74	35	56.9	0.48	3467.840067		0.197582059	9.918259591	4.866916899	1.599821919	15.84004	5.0	0.55913	4.7	0.95	1.788508608	4.71973641	0.20547	1.6	-2.35256E-16		3644	331	2870	26	2867	48	2863	109		0		2867.205937	164.7337856	2824.709326	671.0901116		220	13.50	491	460707.6462	1.92		7.33	0.02	0.55	1.44	0.30
F1108 M 471 12/3/2013 8:48:59 AM (Run: 1)	burn through?	138	70	100.1		16200.83804		0.193181169	9.52942359	5.089465328	1.596467715	14.22083	4.3	0.52492	4.0	0.93	1.905040754	4.009672196	0.19648	1.6	0		3570	312	2797	26	2765	41	2720	89		3		2764.644978	126.7840446	2674.105817	330.8051797
F1108 M 500 12/3/2013 9:52:32 AM (Run: 1)		78	37	58.7	0.47	10889.29232		0.202877733	9.762407036	5.096565735	1.976540657	14.84135	4.5	0.54859	4.0	0.90	1.822846786	4.021192705	0.19621	2.0	-2.23496E-16		3734	333	2795	32	2805	43	2819	92		-1		2805.091184	135.3001905	2774.787915	469.2519664		288	14.72	648	438893.2887	3.64	0.14	8.20	0.04	1.70	2.94	0.31
F1108 M 465 12/3/2013 8:38:48 AM (Run: 1)		112	69	80.6	0.61	3332.559864		0.192608861	9.644700652	5.421820024	1.795371146	12.87017	5.4	0.50609	5.1	0.94	1.9759317	5.055834874	0.18444	1.8	-1.95697E-16		3560	315	2693	30	2670	51	2640	110		2		2670.265588	150.2834582	2578.111589	472.5175045		154	11.03	333	462601.0775	1.13		16.09	0.04	1.22	2.35	0.63
F1108 M 551 12/3/2013 11:47:31 AM (Run: 1)		193	49	115.1	0.25	10299.68558		0.15279156	9.648218606	5.753471771	1.433955659	11.38567	4.0	0.47510	3.7	0.93	2.104809217	3.683855059	0.17381	1.4	5.04409E-16		2874	258	2595	24	2555	37	2506	76		3		2555.380614	100.2962403	2495.994231	212.4836215		137	4.06	328	520661.3613	2.40		7.55	0.02	0.21	0.80	0.03
F1108 M 488 12/3/2013 9:28:33 AM (Run: 1)		179	64	125.6	0.35	9345.129833		0.196079194	9.715969021	5.819749995	2.747983766	12.75617	5.8	0.53842	5.1	0.88	1.857277233	5.077333523	0.17183	2.7	0		3619	322	2576	46	2662	54	2777	115		-8		2661.53614	161.9882304	2746.06028	503.8612936		125	3.94	471	440449.8651	0.76	0.08	7.17	0.06	1.29	3.84	0.32
F1108 M 527 12/3/2013 10:56:02 AM (Run: 1)		69	54	42.7	0.78	1716.334189		0.139994482	9.624320084	6.275261117	2.220329966	9.58082	4.8	0.43605	4.2	0.89	2.293331932	4.2440242	0.15936	2.2	-3.7702E-16		2648	239	2449	38	2395	44	2333	83		5		2395.517339	103.6935688	2304.314933	837.2832301		215	8.63	1095	505170.7913	1.72	0.05	6.09	0.56	9.78	12.24	0.86
F1108 M 474 12/3/2013 8:54:04 AM (Run: 1)	high U signal variance	297	36	146.3		9798.739116		0.174155046	12.62215712	6.52887411	1.446806672	8.64681	5.0	0.40944	4.8	0.96	2.442345904	4.796487693	0.15317	1.4	-7.67923E-16		3245	378	2382	25	2301	46	2212	90		7		2301.780347	108.4733478	2198.417991	132.2585851
F1108 M 515 12/3/2013 10:28:45 AM (Run: 1)		132	62	55.8	0.47	2125.949508		0.15049201	10.63398488	8.129577305	3.948690518	5.34307	5.4	0.31503	3.7	0.69	3.174258158	3.712962991	0.12301	3.9	-2.42318E-16		2834	281	2000	70	1876	46	1765	57		12		1876.284656	64.18975338	1701.233453	447.7364835		269	13.33	642	431313.4613	2.73	0.14	5.29	0.11	1.27	3.11	0.29
F1108 M 563 12/3/2013 12:11:31 PM (Run: 1)		149	96	67.4	0.65	1618.245809		0.132848924	9.64047426	8.324887262	1.387286328	5.43371	3.8	0.32808	3.5	0.93	3.04807898	3.503165505	0.12012	1.4	1.82757E-16		2521	229	1958	25	1890	32	1829	56		7		1890.464794	62.66612426	1771.412276	670.0114327		342	10.04	958	446105.0343	2.43	1.00	14.85	0.31	2.75	3.44	1.16
F1108 M 558 12/3/2013 12:03:02 PM (Run: 1)		510	605	261.4	1.19	8172.785054		0.117142345	9.447770571	8.45069988	1.705540492	5.45436	4.7	0.33430	4.3	0.93	2.991331367	4.336539973	0.11833	1.7	2.40173E-16		2239	200	1931	31	1893	40	1859	70		4		1893.596941	79.1888832	1797.922652	2306.853931		425	21.84	2661	473731.797	7.05	0.05	56.27	0.66	11.67	21.02	2.46
F1108 M 510 12/3/2013 10:16:38 AM (Run: 1)		109	40	47.4	0.36	7176.941171		0.127608842	10.5349511	8.462452108	2.118103387	5.65001	4.2	0.34677	3.6	0.86	2.883739142	3.580222125	0.11817	2.1	0		2427	241	1929	38	1924	36	1919	59		0		1923.783416	68.06931587	1896.89023	270.029221		168	20.35	207	453860.368	0.77	0.05	3.11	0.09	1.34	2.46	0.07
F1108 M 507 12/3/2013 10:11:33 AM (Run: 1)	high U signal variance	234	101	92.9	0.43	3720.15227		0.118558993	10.03825358	8.815966232	2.260492936	4.86067	5.3	0.31079	4.8	0.90	3.217620671	4.803116452	0.11343	2.3	3.27216E-16		2265	215	1855	41	1795	45	1745	73		6		1795.715266	81.57309344	1716.415577	404.5871295		145	7.63	600	445874.7843	1.94		17.11	0.05	0.69	2.30	1.11
F1108 M 547 12/3/2013 11:40:43 AM (Run: 1)		34	65	16.9		1174.655572		0.087870618	10.14202959	8.820940008	3.152300949	4.70282	4.8	0.30087	3.6	0.75	3.323748583	3.553566303	0.11337	3.2	-3.17152E-16		1702	166	1854	57	1768	40	1696	53		9		1768.103016	58.65250913	1693.576969	2075.039906
F1108 M 577 12/3/2013 12:42:18 PM (Run: 1)	high U signal variance	131	112	61.0	0.86	3845.621384		0.126856069	9.473891701	8.843169947	2.092723085	5.00081	4.7	0.32074	4.2	0.90	3.117833108	4.204633319	0.11308	2.1	-2.01879E-16		2414	216	1850	38	1819	40	1793	66		3		1819.585224	73.80831174	1722.68855	#VALUE!		136	6.94	385	442659.7154	0.97		14.33	0.05	1.01	2.47	0.28
F1108 M 535 12/3/2013 11:13:14 AM (Run: 1)		320	225	134.3	0.70	5500.134964		0.092404347	9.498799499	8.86916421	1.440053002	4.95841	3.7	0.31895	3.4	0.92	3.135279436	3.404326477	0.11275	1.4	0		1786	162	1844	26	1812	31	1785	53		3		1812.393059	59.39258419	1784.443761	656.5488487		309	8.20	1600	564612.6122	4.11		20.21	0.10	2.25	6.86	1.16
F1108 M 573 12/3/2013 12:35:31 PM (Run: 1)	high U signal variance	89	92	43.2	1.03	702.2658424		0.128733742	10.31290085	8.89272062	2.028605927	4.90549	4.7	0.31638	4.2	0.90	3.160706257	4.193532195	0.11245	2.0	4.17621E-16		2448	238	1839	37	1803	39	1772	65		4		1803.353	72.59929682	1676.681399	1974.604359		123	6.29	356	435428.5412	0.75		8.42	0.05	0.63	2.16	0.11
F1108 M 552 12/3/2013 11:49:13 AM (Run: 1)	high U signal variance	70	18	28.2	0.26	1941.781946		0.104650621	10.82807691	8.912281725	2.754108734	5.22399	5.4	0.33767	4.6	0.86	2.961489842	4.614062135	0.11220	2.8	-2.79573E-16		2012	207	1835	50	1857	46	1875	75		-2		1856.448784	85.55711187	1871.209888	260.4459166		108	2.83	287	528398.9349	0.69		2.22	0.04	0.32	1.08	0.44
F1108 M 562 12/3/2013 12:09:49 PM (Run: 1)		302	103	118.5	0.34	3275.317151		0.116656448	9.753243168	8.931531323	1.82457322	4.88777	4.7	0.31662	4.4	0.92	3.15838439	4.382602136	0.11196	1.8	-2.22145E-16		2230	206	1832	33	1800	40	1773	68		3		1800.280651	75.91486905	1753.899666	332.5379908		168	3.84	1142	465337.1218	6.20		13.60	0.10	2.81	6.65	0.22
F1108 M 469 12/3/2013 8:45:35 AM (Run: 1)	reverse fractionation	23	27	10.9		7588.585241		0.13205188	14.58498105	8.942839271	5.074328759	4.47024	8.5	0.28994	6.8	0.80	3.449018067	6.815493826	0.11182	5.1	4.10908E-16		2507	344	1829	92	1725	71	1641	99		10		1725.898822	108.188676	1496.052328	2399.968835
F1108 M 495 12/3/2013 9:44:04 AM (Run: 1)		12	7	4.9	0.58	585.5023486		0.134378134	13.25813537	8.979550461	5.661594431	4.77666	8.7	0.31108	6.6	0.76	3.214564362	6.552031302	0.11136	5.7	0		2548	317	1822	103	1781	73	1746	100		4		1780.977955	112.0174447	1686.013642	593.1838466		156	25.41	289	464083.3661	0.04		0.43	0.05	0.64	1.84	1.86
F1108 M 571 12/3/2013 12:32:07 PM (Run: 1)		109	45	45.7	0.41	5783.93824		0.134704184	9.65996235	8.993742776	2.952737689	5.01102	5.6	0.32686	4.7	0.85	3.059389999	4.728158932	0.11119	3.0	1.27237E-16		2554	232	1819	54	1821	47	1823	75		0		1821.17559	84.83316618	1785.653998	471.2075716		229	12.30	454	441596.1456	1.51		5.08	0.02	0.86	1.84	0.53
F1108 M 568 12/3/2013 12:27:02 PM (Run: 1)		197	76	79.2		5676.566619		0.124526827	9.708749843	9.018878326	2.387258922	4.86754	6.3	0.31839	5.8	0.93	3.140795375	5.81803292	0.11088	2.4	0		2372	217	1814	43	1797	53	1782	91		2		1796.726564	101.4280388	1753.589599	447.4370405
F1108 M 546 12/3/2013 11:39:02 AM (Run: 1)		190	104	77.1		3279.486528		0.09073305	10.02166995	9.035647334	1.706279557	4.89370	3.8	0.32070	3.4	0.90	3.118206136	3.438935235	0.11067	1.7	0		1755	168	1811	31	1801	32	1793	54		1		1801.210757	60.4468108	1795.69407	501.6552686
F1108 M 549 12/3/2013 11:44:07 AM (Run: 1)		128	106	53.4	0.83	1947.164024		0.099083543	9.770244249	9.039175614	1.952285634	4.60966	4.1	0.30220	3.6	0.88	3.309054412	3.57556622	0.11063	2.0	2.54473E-16		1910	178	1810	35	1751	34	1702	53		6		1751.265561	59.14465745	1679.329975	1570.358759		304	10.92	998	542595.3631	2.42	0.02	21.85	0.08	1.79	4.39	1.41
F1108 M 506 12/3/2013 10:09:51 AM (Run: 1)		158	181	71.8	1.14	2723.684376		0.105514772	10.50506537	9.051713428	2.699194929	4.56405	4.7	0.29963	3.9	0.82	3.337493743	3.895479506	0.11048	2.7	1.68941E-16		2028	203	1807	49	1743	39	1689	58		7		1743.000601	63.97495472	1635.507967	1096.238183		328	11.28	821	459486.0072	3.99		12.32	0.11	1.71	5.18	1.11
F1108 M 513 12/3/2013 10:21:44 AM (Run: 1)	high U signal variance	228	96	95.8	0.42	20994.66633		0.126576246	9.919019869	9.110612773	2.182128023	4.99769	4.8	0.33023	4.2	0.89	3.028196767	4.230898149	0.10976	2.2	-1.92405E-16		2409	225	1795	40	1819	40	1839	68		-2		1818.832383	76.70691585	1809.820253	372.5001661		175	5.70	622	451069.2153	2.37		7.96	0.05	1.13	2.85	0.24
F1108 M 554 12/3/2013 11:52:36 AM (Run: 1)		92	68	38.8		11257.28143		0.100668832	9.790524404	9.141078385	2.562879073	4.71107	5.2	0.31233	4.5	0.87	3.201728003	4.50089306	0.10940	2.6	0		1939	181	1789	47	1769	43	1752	69		2		1769.295215	77.09711418	1734.225965	780.2958439
F1108 M 576 12/3/2013 12:40:36 PM (Run: 1)		108	110	49.4	1.01	592.9437761		0.11652761	9.471993486	9.180269514	2.820297803	4.56816	4.8	0.30416	3.9	0.81	3.287793176	3.861818046	0.10893	2.8	0		2228	200	1782	51	1743	40	1712	58		4		1743.640377	64.49917631	1640.047094	#VALUE!		254	16.49	624	449785.3693	0.94	0.06	13.86	0.17	2.16	4.70	1.15
F1108 M 533 12/3/2013 11:06:12 AM (Run: 1)		122	56	49.3	0.46	2296.180079		0.098793111	10.2781078	9.202722631	2.05963792	4.83024	4.8	0.32239	4.3	0.90	3.101819201	4.333382468	0.10866	2.1	-5.97081E-16		1904	187	1777	38	1790	40	1801	68		-1		1790.123415	76.66732359	1795.574455	535.8438595		188	7.60	585	548097.1083	2.38		5.26	0.03	0.56	1.43	0.16
F1108 M 529 12/3/2013 10:59:25 AM (Run: 1)		301	63	112.1	0.21	3064.626652		0.100786911	10.51726485	9.212585681	1.81806694	4.74920	4.0	0.31732	3.6	0.89	3.1513675	3.611166587	0.10855	1.8	2.70566E-16		1941	195	1775	33	1776	34	1777	56		0		1775.963675	62.87361172	1772.466688	365.2712618		223	10.84	825	514352.0743	0.72		4.27	0.10	2.08	4.06	0.74
F1108 M 489 12/3/2013 9:30:15 AM (Run: 1)		247	86	91.2	0.35	10574.81202		0.116604523	9.646427482	9.346630317	2.524076579	4.38512	4.5	0.29726	3.7	0.83	3.364065499	3.732206852	0.10699	2.5	1.88565E-16		2229	204	1749	46	1710	37	1678	55		4		1709.707487	60.93438171	1653.419551	618.7056696		254	6.51	543	425876.8366	2.25		8.45	0.00	1.09	1.78	0.34
F1108 M 484 12/3/2013 9:14:40 AM (Run: 1)		82	53	35.9	0.64	2099.68702		0.124421008	9.731703189	9.363366811	2.227727663	4.75359	5.0	0.32281	4.5	0.90	3.097758309	4.526594358	0.10680	2.2	1.76156E-16		2370	218	1745	41	1777	42	1803	71		-3		1776.607823	80.29870667	1757.008405	580.5313339		205	13.34	421	453189.4039	1.24		8.67		0.75	2.29	0.26
F1108 M 483 12/3/2013 9:12:58 AM (Run: 1)		114	196	63.3	1.72	23388.03873		0.120235652	9.377269844	9.39292278	1.980374433	4.64714	4.7	0.31658	4.3	0.91	3.158747284	4.2600712	0.10646	2.0	0		2295	203	1740	36	1758	39	1773	66		-2		1757.701935	74.07470837	1637.322675	446.2537461		227	3.24	1023	444371.2038	1.49	0.15	15.56	0.45	6.44	7.32	1.24
F1108 M 517 12/3/2013 10:32:09 AM (Run: 1)		165	65	62.9	0.39	2703.307324		0.115746731	9.663781523	9.400914795	2.381440505	4.46343	5.5	0.30433	4.9	0.90	3.285958547	4.915694008	0.10637	2.4	1.51742E-16		2214	203	1738	44	1724	45	1713	74		1		1724.258946	82.10401982	1687.835436	392.7573439		276	2.58	741	438339.6776	2.24	0.01	5.17	0.09	1.03	2.18	0.22
F1108 M 487 12/3/2013 9:26:51 AM (Run: 1)		205	85	83.6	0.41	1682.719257		0.126632571	9.769211138	9.442017059	2.154390385	4.68125	5.3	0.32057	4.9	0.91	3.119423606	4.858266944	0.10591	2.2	1.69717E-16		2410	222	1730	40	1764	44	1793	76		-4		1763.749931	85.58864483	1760.710143	426.8952743		107	4.34	452	450033.1112	0.23	0.19	6.09	0.16	1.63	2.95	1.16
F1108 M 528 12/3/2013 10:57:44 AM (Run: 1)		174	70	67.7	0.40	3736.238321		0.101787933	10.00006159	9.464877042	1.731201802	4.58259	4.3	0.31458	3.9	0.92	3.178890641	3.927808548	0.10565	1.7	5.22471E-16		1959	187	1726	32	1746	36	1763	61		-2		1746.018115	67.88041939	1753.432377	688.9871035		290	7.70	887	511301.4977	2.49	0.09	12.66	0.10	1.88	3.12	0.35
F1108 M 518 12/3/2013 10:33:50 AM (Run: 1)		172	65	62.4	0.38	12187.30617		0.108169204	10.09136556	9.46749721	2.55476693	4.23484	4.5	0.29078	3.7	0.83	3.438976097	3.734710492	0.10562	2.6	-1.86175E-16		2076	199	1725	47	1681	37	1645	54		5		1680.991113	59.68689044	1624.656441	701.6940092		425	7.65	1085	454141.4887	1.59	0.95	14.52	0.51	5.27	9.12	2.31
F1108 M 497 12/3/2013 9:47:27 AM (Run: 1)		273	93	98.4	0.34	7838.547641		0.109079279	10.01791244	9.499592445	2.5046209	4.23949	5.0	0.29209	4.3	0.86	3.423594543	4.301253921	0.10527	2.5	3.29779E-16		2093	199	1719	46	1682	41	1652	63		4		1681.863099	69.00789913	1632.940175	298.7745171		180	8.20	274	446924.9629	0.32	0.02	7.23	0.09	1.28	2.41	0.90
F1108 M 550 12/3/2013 11:45:49 AM (Run: 1)		69	42	27.6	0.60	1799.372751		0.094819953	10.06629875	9.60490801	2.342696155	4.44290	4.5	0.30950	3.8	0.85	3.231035093	3.84350505	0.10411	2.3	1.97282E-16		1831	176	1699	43	1720	37	1738	59		-2		1720.281722	65.48200627	1731.131417	679.778851		177	16.44	771	531745.2722	1.14	0.02	2.67	0.17	2.68	5.91	1.03
F1108 M 472 12/3/2013 8:50:41 AM (Run: 1)		336	94	124.1	0.28	15656.53677		0.119069496	9.321622303	9.628567053	1.472359563	4.36122	3.9	0.30456	3.6	0.93	3.283455624	3.628058133	0.10386	1.5	3.32539E-16		2274	200	1694	27	1705	32	1714	55		-1		1704.976595	60.7269969	1694.424935	301.4869507		179	6.78	249	445138.1581	0.86		1.40	0.05	1.34	5.82	0.20
F1108 M 531 12/3/2013 11:02:49 AM (Run: 1)		145	78	57.5	0.54	1747.687984		0.100522738	9.696279681	9.644563363	1.654248698	4.43024	4.1	0.30989	3.7	0.91	3.226947234	3.732655643	0.10369	1.7	-2.87681E-16		1936	179	1691	31	1718	34	1740	57		-3		1717.893921	63.61630068	1726.758531	600.8980043		195	6.92	592	517482.9034	4.03	2.36	17.05	0.70	5.05	4.56	0.05
F1108 M 542 12/3/2013 11:25:07 AM (Run: 1)	burn through?	30	34	10.9		646.3388815		0.071076579	10.90907608	9.676653013	5.96855764	3.59772	7.9	0.25249	5.2	0.66	3.960488379	5.241515767	0.10334	6.0	1.13562E-16		1388	146	1685	110	1549	63	1451	68		14		1549.614099	73.2153622	1461.436524	1362.425644
F1108 M 553 12/3/2013 11:50:54 AM (Run: 1)		85	82	35.3	0.96	812.7551115		0.095493447	9.76722663	9.75635041	1.736888297	4.15570	4.3	0.29406	4.0	0.92	3.400713806	3.979756504	0.10250	1.7	0		1843	172	1670	32	1665	36	1662	58		0		1665.351509	64.35905709	1637.967443	837.0871318		265	15.29	796	516556.8345	1.74	0.03	25.40	0.05	1.75	4.24	1.71
F1108 M 514 12/3/2013 10:23:26 AM (Run: 1)		127	56	46.0	0.44	2467.974325		0.114689758	9.663087627	9.829075013	2.32255308	3.97005	4.9	0.28301	4.3	0.88	3.533398019	4.275603926	0.10174	2.3	-1.78882E-16		2195	201	1656	43	1628	39	1607	61		3		1628.217542	66.60494082	1572.887996	217.1096603		252	8.37	1086	456559.9011	3.31	0.41	8.01	0.21	1.83	5.28	0.76
F1108 M 521 12/3/2013 10:38:52 AM (Run: 1)		137	119	49.1	0.87	792.9478974		0.099561142	9.664683219	9.830524798	3.457034578	3.46802	4.8	0.24726	3.4	0.70	4.044296007	3.362042848	0.10172	3.5	-1.52835E-16		1918	177	1656	64	1520	38	1424	43		14		1520.56058	45.97091332	1363.368632	1528.202401		279	19.52	674	448888.8738	2.09	0.38	22.21	0.10	1.27	3.12	0.54
F1108 M 560 12/3/2013 12:06:26 PM (Run: 1)		39	45	16.8	1.15	862.9814749		0.10566638	9.64297021	9.844939816	3.453787113	3.98327	5.6	0.28441	4.4	0.78	3.515993621	4.350015498	0.10158	3.5	1.18234E-16		2030	186	1653	64	1631	45	1614	62		2		1630.890685	68.27069427	1545.162291	2120.493496		275	28.98	614	473956.8454	1.20		19.82	0.08	1.59	3.23	0.83
F1108 M 539 12/3/2013 11:20:01 AM (Run: 1)	reverse fractionation	55	38	18.7	0.68	7501.774701		0.074814984	10.40099837	10.00467634	5.183867843	3.60146	6.0	0.26132	2.9	0.49	3.826653304	2.933295854	0.09995	5.2	0		1458	146	1623	96	1550	47	1497	39		8		1550.174995	43.04799221	1500.110542	1317.55775		169	4.92	342	549047.0997	0.24	0.43	5.40	0.15	1.37	2.67	1.02
F1108 M 522 12/3/2013 10:40:33 AM (Run: 1)		108	74	40.8	0.69	10172.7958		0.10330614	10.20986483	10.00626315	2.734094762	3.85559	5.1	0.27981	4.4	0.85	3.573871896	4.354128645	0.09994	2.7	1.49216E-16		1987	193	1623	51	1604	41	1590	61		2		1604.517886	67.20251137	1553.708997	673.9029436		365	9.31	925	469041.8027	2.12		15.50	0.04	0.87	3.61	0.40
F1108 M 481 12/3/2013 9:09:35 AM (Run: 1)	high U signal variance	174	121	68.9	0.69	2153.974144		0.112347476	9.497152816	10.01189526	2.248621691	3.97605	4.2	0.28871	3.6	0.85	3.463642716	3.584362547	0.09988	2.2	4.4079E-16		2152	194	1622	42	1629	34	1635	52		-1		1629.288055	57.10058817	1587.41933	1267.178246		280	13.66	684	453162.1997	3.04		12.12	0.02	1.06	3.34	0.20
F1108 M 556 12/3/2013 11:59:38 AM (Run: 1)		118	109	45.8	0.92	1372.854294		0.093474574	9.547604436	10.19768565	2.087890674	3.72098	4.2	0.27521	3.6	0.87	3.633647306	3.629866753	0.09806	2.1	4.68772E-16		1806	165	1588	39	1576	34	1567	50		1		1575.941809	55.16608108	1536.742932	804.2583855		320	9.21	954	485243.7883	5.44	3.07	58.20	1.01	6.43	6.39	0.80
F1108 M 565 12/3/2013 12:21:56 PM (Run: 1)		51	72	21.7	1.43	3128.397968		0.101852819	10.07947972	10.32495905	3.745857736	3.45890	6.1	0.25902	4.8	0.79	3.860776447	4.827856795	0.09685	3.7	1.96451E-16		1960	188	1564	70	1518	48	1485	64		5		1518.103477	69.24730745	1381.124713	1067.344703		213	5.66	452	447381.8319	1.42	0.03	12.73	0.06	1.39	3.44	1.21
F1108 M 523 12/3/2013 10:42:14 AM (Run: 1)		41	51	17.5	1.22	2103.318609		0.09672571	10.43358962	10.32674797	3.382006151	3.72417	5.4	0.27893	4.2	0.78	3.585157856	4.195039439	0.09684	3.4	1.25204E-16		1866	186	1564	63	1577	43	1586	59		-1		1576.521419	64.82316865	1536.796983	1432.595982		224	13.65	1021	489526.0828	0.78		12.48	0.23	3.47	7.57	1.56
F1108 M 503 12/3/2013 9:57:38 AM (Run: 1)		234	122	80.6	0.52	15286.51908		0.104911202	9.725329309	10.3614705	2.161481129	3.52417	4.4	0.26484	3.8	0.87	3.775917253	3.841472456	0.09651	2.2	-2.13935E-16		2016	187	1558	41	1533	35	1515	52		3		1532.765686	56.254013	1479.826525	475.8072968		300	4.81	933	444239.9018	3.29	0.36	18.36	0.12	1.64	2.62	0.23
F1108 M 498 12/3/2013 9:49:09 AM (Run: 1)		54	35	20.5	0.65	8114.012397		0.113616178	10.52366833	10.43169322	3.90872835	3.71038	6.5	0.28072	5.3	0.80	3.562279871	5.254067293	0.09586	3.9	0		2175	217	1545	73	1574	52	1595	74		-3		1573.482076	81.73185366	1544.640046	1222.445209		239	17.59	412	433043.0827	1.60	0.04	6.67	0.11	1.78	2.22	0.24
F1108 M 490 12/3/2013 9:31:57 AM (Run: 1)		214	93	74.4	0.44	8263.330158		0.110951721	9.697596944	10.43471205	1.99089255	3.61787	5.5	0.27380	5.1	0.93	3.652307612	5.139054275	0.09583	2.0	-3.4724E-16		2127	196	1545	37	1553	44	1560	71		-1		1553.429831	77.7766071	1527.711953	392.6823284		182	6.86	577	462473.4528	0.83		5.97	0.07	0.67	3.01	1.15
F1108 M 502 12/3/2013 9:55:56 AM (Run: 1)	high U signal variance	101	48	31.9	0.48	2180.183663		0.105482547	10.3841911	10.48873923	2.960697527	3.16879	4.9	0.24105	3.9	0.80	4.148441711	3.934237433	0.09534	3.0	-1.52502E-16		2027	200	1535	56	1450	38	1392	49		9		1449.961459	52.59839244	1351.033367	428.6350301		221	10.19	697	461110.9298	1.59	0.00	10.65	0.03	1.53	3.25	0.42
F1108 M 491 12/3/2013 9:33:39 AM (Run: 1)		83	58	28.9	0.70	443.5943444		0.100315331	10.28623136	10.4990689	3.136279188	3.34389	5.9	0.25462	5.0	0.85	3.927344499	4.997222972	0.09525	3.1	-2.26682E-16		1932	190	1533	59	1491	46	1462	65		5		1491.547509	70.48357456	1416.832399	799.3441814		203	14.02	504	469394.9475	0.99		10.78	0.01	0.83	2.09	0.33
F1108 M 466 12/3/2013 8:40:29 AM (Run: 1)		137	52	45.4	0.38	4874.991489		0.107327145	9.977041123	10.68355682	2.192988324	3.42750	4.7	0.26558	4.2	0.89	3.765377867	4.194952012	0.09360	2.2	0		2061	195	1500	41	1511	37	1518	57		-1		1510.674011	61.7638877	1491.177211	281.5519341		189	9.37	483	464177.2842	1.81		7.06	0.04	0.81	2.23	0.26
F1108 M 557 12/3/2013 12:01:20 PM (Run: 1)		95	45	30.2		6365.329281		0.095362721	10.27941545	10.72529946	3.392153751	3.18860	5.2	0.24803	3.9	0.76	4.031738209	3.930482193	0.09324	3.4	1.33232E-16		1841	181	1493	64	1454	40	1428	50		4		1454.570003	54.23529155	1402.241315	358.6299828
F1108 M 532 12/3/2013 11:04:31 AM (Run: 1)	high U signal variance	164	151	59.4	0.92	5231.421957		0.082221627	10.12645768	10.74451986	1.707253235	3.35848	3.9	0.26171	3.5	0.90	3.820956151	3.527127731	0.09307	1.7	-2.94993E-16		1597	156	1489	32	1495	31	1499	47		-1		1494.743832	51.19414374	1485.992829	1131.330536		235	15.81	820	539172.5236	0.40		8.04	0.19	1.88	5.02	0.90
F1108 M 559 12/3/2013 12:04:44 PM (Run: 1)		205	153	70.7	0.74	4399.208329		0.092543828	9.399768486	10.74526686	2.106773013	3.23864	4.6	0.25239	4.1	0.89	3.962066783	4.102074261	0.09306	2.1	0		1789	161	1489	40	1466	36	1451	53		3		1466.55981	57.4385836	1416.07915	1498.065374		218	12.83	603	472113.5593	0.93	0.01	12.88	0.15	2.96	3.16	1.36
F1108 M 526 12/3/2013 10:54:20 AM (Run: 1)		168	139	58.2	0.83	3659.55497		0.08741822	9.632089205	10.75483929	2.482057981	3.21359	5.3	0.25067	4.7	0.88	3.98938788	4.668643794	0.09298	2.5	-1.53295E-16		1694	157	1488	47	1460	41	1442	60		3		1460.562233	64.93978219	1412.837357	811.8178659		395	4.15	1473	486445.2372	5.23	26.47	89.72	9.03	60.79	19.05	1.88
F1108 M 566 12/3/2013 12:23:39 PM (Run: 1)		68	51	23.4	0.75	5921.74339		0.101776918	10.80722844	10.80159747	3.940030228	3.13783	6.7	0.24582	5.4	0.81	4.068026655	5.427706623	0.09258	3.9	-3.32257E-16		1959	202	1479	75	1442	52	1417	69		4		1442.18399	74.18724749	1360.367292	708.1513377		249	18.24	564	441452.3356	1.99		12.15	0.00	0.90	2.90	0.33
F1108 M 516 12/3/2013 10:30:27 AM (Run: 1)		82	96	31.9	1.17	7911.074191		0.097779112	9.677010904	10.81111212	2.417036915	3.18733	4.1	0.24992	3.4	0.81	4.001330723	3.369484074	0.09250	2.4	2.18114E-16		1886	174	1478	46	1454	32	1438	43		3		1454.1966	46.81747365	1360.41887	1367.228673		211	23.18	1029	460117.3104	0.73	0.03	17.69	0.56	8.63	12.19	4.91
F1108 M 496 12/3/2013 9:45:46 AM (Run: 1)		44	28	14.5	0.63	469.491259		0.095578876	11.22048179	10.84121188	3.105432811	3.10809	5.7	0.24438	4.7	0.84	4.091948695	4.730627614	0.09224	3.1	-4.8367E-16		1845	198	1472	59	1435	43	1409	60		4		1434.86079	64.27168564	1371.786267	684.9401528		247	13.53	788	451931.4132	1.59		4.65	0.10	1.92	3.95	0.60
F1108 M 485 12/3/2013 9:23:27 AM (Run: 1)		230	168	81.5		8561.602465		0.107643968	9.558954699	10.87524361	2.69152706	3.20436	5.2	0.25274	4.5	0.86	3.956591767	4.460707332	0.09195	2.7	-1.47954E-16		2066	188	1466	51	1458	40	1453	58		1		1458.250098	62.65699403	1390.488028	860.5412579
F1108 M 548 12/3/2013 11:42:25 AM (Run: 1)		89	158	35.8	1.77	3003.858216		0.073794753	9.662041129	10.89288311	2.892383145	3.14077	5.0	0.24813	4.1	0.82	4.030161058	4.132004293	0.09180	2.9	1.48632E-16		1439	134	1463	55	1443	39	1429	53		2		1442.830891	57.03850772	1425.919258	4016.598531		504	10.31	2482	541009.9473	1.98	0.06	43.23	0.16	3.74	9.41	4.20
F1108 M 508 12/3/2013 10:13:15 AM (Run: 1)	high U signal variance	49	104	22.4		16308.5691		0.090616276	10.11019904	10.9187988	3.503766046	3.04684	6.1	0.24128	4.9	0.82	4.144539137	4.93999805	0.09159	3.5	-4.10514E-16		1753	170	1459	67	1419	46	1393	62		4		1419.617055	66.34729413	1262.137097	5270.772107
F1108 M 494 12/3/2013 9:38:45 AM (Run: 1)	high U signal variance	165	53	52.8	0.32	1097.952653		0.096560216	9.850058826	10.95350574	2.992030108	3.33455	6.7	0.26490	6.0	0.89	3.77494213	5.955230394	0.09129	3.0	1.99386E-16		1863	175	1453	57	1489	52	1515	80		-4		1489.016301	87.65600976	1500.396261	372.6047579		138	6.05	270	472467.3889	0.42		9.61	0.02	0.38	1.47	0.55
F1108 M 545 12/3/2013 11:37:20 AM (Run: 1)		99	92	31.0	0.93	1345.03973		0.067209103	9.791817312	11.14470904	2.299338779	2.84403	3.9	0.22988	3.1	0.81	4.350086717	3.143668778	0.08973	2.3	-1.22874E-16		1315	125	1420	44	1367	29	1334	38		6		1367.469717	40.34055298	1336.421171	914.3537476		149	7.04	1011	581795.2783	0.61		3.85	0.10	2.00	3.74	0.98
F1108 M 492 12/3/2013 9:35:21 AM (Run: 1)		63	11	16.7	0.18	7820.50518		0.088777555	12.17770696	11.18404922	3.185861175	2.80604	6.0	0.22761	5.1	0.85	4.393484541	5.118718149	0.08941	3.2	0		1719	201	1413	61	1357	45	1322	61		6		1357.397693	65.01562773	1312.790124	178.6995749		101	0.91	149	471607.5814	0.33		3.41		0.08		0.22
F1108 M 509 12/3/2013 10:14:56 AM (Run: 1)		144	76	47.2	0.53	1241.731301		0.096009341	9.779500364	11.20168573	2.414375054	3.14170	5.0	0.25524	4.4	0.88	3.917897198	4.405063161	0.08927	2.4	0		1853	173	1410	46	1443	39	1465	58		-4		1442.818913	62.64026146	1438.091494	1006.903023		212	18.69	396	463745.9661	1.17	0.03	13.76	0.10	1.38	3.81	1.38
F1108 M 467 12/3/2013 8:42:11 AM (Run: 1)	burn through?	155	61	48.0	0.39	2037.504652		0.09519303	9.501425764	11.31019367	2.19375145	3.04399	4.9	0.24970	4.4	0.89	4.004860624	4.369779054	0.08842	2.2	-1.85303E-16		1838	167	1392	42	1419	37	1437	56		-3		1418.603889	60.84441724	1416.135286	262.7555031		492	18.47	1039	458020.602	2.33		10.11	0.08	2.36	5.59	0.72
F1108 M 530 12/3/2013 11:01:07 AM (Run: 1)		107	76	33.8	0.71	5114.56526		0.078268099	9.899827833	11.39685908	2.362159669	2.89294	4.5	0.23912	3.8	0.85	4.181925451	3.835358934	0.08774	2.4	1.96072E-16		1523	145	1377	45	1380	34	1382	48		0		1380.059021	51.24259633	1368.352967	666.0876946		109	5.27	276	522495.2484	1.00		16.40	0.05	0.50	1.21	0.71
F1108 M 570 12/3/2013 12:30:26 PM (Run: 1)	reverse fractionation	168	74	46.9	0.44	2345.505622		0.093326723	10.09987932	11.41386064	2.28782849	2.63964	4.2	0.21851	3.5	0.84	4.576402569	3.540094713	0.08761	2.3	4.38654E-16		1803	174	1374	44	1312	31	1274	41		7		1312.034806	43.29644689	1241.796362	413.1834778		365	3.98	981	446055.9126	1.56		7.64	0.03	0.85	3.22	0.73
F1108 M 477 12/3/2013 9:02:48 AM (Run: 1)	burn through?	71	48	22.1	0.67	11593.22517		0.090507733	9.644243532	11.42648627	3.453702852	2.79523	5.4	0.23165	4.2	0.77	4.316885665	4.177543113	0.08752	3.5	0		1751	162	1372	66	1354	41	1343	51		2		1354.341974	54.19505889	1304.751903	674.9304867		179	9.13	1187	484168.8503	1.96		9.13	0.37	8.24	11.18	0.84
F1108 M 574 12/3/2013 12:37:13 PM (Run: 1)		184	138	59.0	0.75	2053.85513		0.091884865	9.446311724	11.45614596	1.868252903	2.79025	5.3	0.23184	5.0	0.94	4.313403752	4.96271451	0.08729	1.9	0		1777	161	1367	36	1353	40	1344	60		2		1352.990718	64.26624981	1298.146301	603.3216275		214	12.24	704	442091.879	0.91		19.68	0.23	3.25	6.43	0.85
F1108 M 544 12/3/2013 11:28:31 AM (Run: 1)		37	28	10.8	0.76	7953.962201		0.067894781	10.64538769	11.45718118	2.409776531	2.69913	5.1	0.22428	4.5	0.88	4.458618404	4.452941567	0.08728	2.4	-3.31083E-16		1328	137	1367	46	1328	38	1304	53		5		1328.391354	55.86058273	1301.985077	729.825972		147	16.20	682	596392.4901	1.54		2.61	0.10	2.08	4.47	0.32
F1108 M 499 12/3/2013 9:50:51 AM (Run: 1)		29	23	8.4	0.79	10621.81818		0.08455141	10.53730911	11.51525644	5.63840522	2.41174	7.5	0.20142	4.9	0.66	4.964755668	4.915176322	0.08684	5.6	-1.28193E-16		1641	166	1357	109	1246	54	1183	53		13		1246.588726	55.81953697	1130.225227	1685.004991		217	19.95	373	446481.6959	1.06	0.29	7.36	0.09	1.11	1.54	0.38
F1108 M 475 12/3/2013 8:59:24 AM (Run: 1)		44	18	13.2	0.41	470.3151018		0.096523474	10.58422795	11.535195	2.840456828	2.83055	5.2	0.23681	4.3	0.84	4.222850282	4.344872987	0.08669	2.8	1.43935E-16		1862	188	1354	55	1364	39	1370	54		-1		1363.622425	57.58034327	1342.672415	537.0627365		97	6.17	130	463740.6765	0.13		0.90		0.10	0.27	0.17
F1108 M 537 12/3/2013 11:16:38 AM (Run: 1)		56	56	17.5	1.01	39761.26092		0.065334796	10.63131985	11.56360749	3.002743789	2.72947	5.3	0.22891	4.4	0.82	4.368474368	4.354593631	0.08648	3.0	1.35851E-16		1279	132	1349	58	1337	39	1329	52		1		1336.569651	55.84299339	1336.045872	1292.347635		190	7.27	1067	602288.6952	0.60		11.88	0.06	2.37	6.49	1.12
F1108 M 536 12/3/2013 11:14:56 AM (Run: 1)	high U signal variance	15	50	6.8	3.28	315.4384189		0.062117161	10.09008446	11.61468846	6.757373312	2.59201	9.0	0.21834	5.9	0.66	4.579913464	5.907284895	0.08610	6.8	1.78002E-16		1218	119	1340	131	1298	66	1273	68		5		1298.569833	72.66118935	1312.413602	6760.348334		287	67.64	1028	594760.146	0.40	0.03	14.11	0.54	11.11	13.63	7.03
F1108 M 555 12/3/2013 11:57:56 AM (Run: 1)	high U signal variance	260	127	72.2	0.49	5436.624916		0.074945798	9.946893829	11.72931359	2.905217352	2.60742	5.5	0.22181	4.7	0.85	4.508352987	4.686316535	0.08526	2.9	-1.30473E-16		1461	140	1321	56	1303	40	1291	55		2		1302.812562	58.32473853	1280.166407	460.459964		163	6.22	658	499672.5056	2.28		9.08	0.04	0.70	2.70	0.24
F1108 M 493 12/3/2013 9:37:03 AM (Run: 1)	high U signal variance	199	263	67.8	1.32	2545.04087		0.082494314	9.560620337	11.89064572	2.872494759	2.47321	5.6	0.21329	4.8	0.86	4.688516155	4.766339245	0.08410	2.9	-1.29744E-16		1602	147	1295	56	1264	40	1246	54		4		1264.368614	57.16341055	1172.720912	1666.332884		276	12.49	1652	480256.0528	1.34	0.07	31.12	0.76	11.37	15.58	6.22
F1108 M 501 12/3/2013 9:54:14 AM (Run: 1)		99	66	27.8	0.67	2055.438524		0.081845592	10.32976426	12.11184598	2.553424529	2.38939	4.4	0.20989	3.6	0.82	4.764357721	3.629077407	0.08256	2.6	0		1590	158	1259	50	1239	32	1228	41		2		1239.513975	42.95933599	1193.93954	606.1036429		174	9.38	1665	449674.2018	2.84	0.04	10.33	0.74	12.01	18.33	0.77
F1108 M 569 12/3/2013 12:28:44 PM (Run: 1)		303	137	76.8	0.45	6308.939404		0.082389833	9.389209993	12.15432957	2.129679249	2.26419	4.0	0.19959	3.3	0.84	5.010228896	3.334703775	0.08228	2.1	3.75189E-16		1600	144	1252	42	1201	28	1173	36		6		1201.436122	37.58076286	1146.141972	447.8963101		248	8.65	1043	439782.1472	13.23		13.74	0.03	1.38	4.08	0.16
F1108 M 567 12/3/2013 12:25:20 PM (Run: 1)		327	100	79.5	0.31	7741.956953		0.083405988	9.994047511	12.21820845	3.00321357	2.27053	6.5	0.20120	5.7	0.89	4.970120001	5.738491722	0.08185	3.0	4.12293E-16		1619	156	1242	59	1203	46	1182	62		5		1203.351996	65.1764026	1163.490359	374.0293064		385	3.35	622	437267.1339	2.74		10.74	0.02	0.70	2.45	0.69
F1108 M 578 12/3/2013 12:44:00 PM (Run: 1)		40	83	15.8	2.07	647.768445		0.081146336	9.622359511	12.22536403	4.992338199	2.37356	6.5	0.21046	4.2	0.65	4.751592242	4.217058263	0.08180	5.0	-1.68751E-16		1577	146	1241	98	1235	47	1231	47		1		1234.700967	50.311812	1103.458583	#VALUE!		193	28.01	461	461584.5648	0.74	0.01	28.27	0.09	2.64	5.35	1.28
F1108 M 575 12/3/2013 12:38:54 PM (Run: 1)		277	169	75.0	0.61	11150.71171		0.080042706	9.275945156	12.26345596	2.576759777	2.30585	4.4	0.20509	3.6	0.81	4.875919361	3.557272906	0.08154	2.6	0		1556	139	1235	51	1214	31	1203	39		3		1214.180131	41.22939116	1171.951393	868.7488816		255	6.72	829	451582.8242	4.49	0.06	23.63	0.05	1.06	2.53	0.42
F1108 M 543 12/3/2013 11:26:49 AM (Run: 1)		30	57	10.3	1.86	323.0689523		0.059932224	10.58460776	12.29212182	4.460542074	2.34326	6.4	0.20890	4.6	0.72	4.78689112	4.610687082	0.08135	4.5	0		1176	121	1230	88	1226	46	1223	51		1		1225.533634	54.52521376	1237.582398	2195.068657		236	22.50	622	591582.7527	0.96		28.57	0.18	2.79	3.67	1.25
F1108 M 520 12/3/2013 10:37:11 AM (Run: 1)		25	58	10.2	2.30	254.4144768		0.081208778	10.03296977	12.38109122	5.432488866	2.21253	7.6	0.19868	5.4	0.70	5.033307156	5.385856512	0.08077	5.4	2.42849E-16		1578	152	1216	107	1185	53	1168	58		4		1185.148773	60.71867298	988.8395399	5824.650683		334	33.36	874	460446.8025	1.50	0.33	23.88	0.28	4.10	8.13	1.83
F1108 M 538 12/3/2013 11:18:20 AM (Run: 1)		629	60	129.7	0.10	4560.37494		0.054774731	9.907853111	12.48498611	1.509492072	2.05560	3.8	0.18613	3.5	0.92	5.372488058	3.496466071	0.08010	1.5	-3.36566E-16		1078	104	1199	30	1134	26	1100	35		8		1134.444896	36.88774495	1100.680564	184.9815431		219	2.40	608	561819.8222	0.71		5.93	0.05	1.09	5.39	3.29
F1108 M 534 12/3/2013 11:07:54 AM (Run: 1)	high U signal variance	69	40	17.3	0.58	3307.052509		0.061675337	11.19420852	12.58463765	2.679913283	2.18836	5.7	0.19974	5.0	0.88	5.006579301	4.980109956	0.07946	2.7	-2.66195E-16		1210	131	1184	53	1177	39	1174	53		1		1177.372862	56.35123684	1171.004123	632.8909199		198	13.57	671	571144.196	1.71		4.88	0.04	0.69	1.72	0.22
F1108 M 482 12/3/2013 9:11:17 AM (Run: 1)		119	60	30.9	0.50	1889.584317		0.080656637	10.26307019	12.59595917	2.432039593	2.22785	5.7	0.20352	5.2	0.91	4.913414614	5.205953164	0.07939	2.4	2.80601E-16		1568	155	1182	48	1190	40	1194	57		-1		1189.80771	59.98173462	1168.008159	590.9990546		231	15.53	574	442996.4499	2.59		7.08	0.08	1.10	2.99	0.32
Experiment 5 - 3 December 2013
Isotope ratio and date errors include systematic calibration errors of 1.12% (207Pb/206Pb) and 5.04% (206Pb/238U) (2 sigma).
Trace element concentrations were deleted from analyses known to have intersected inclusions of non-zircon minerals based on P and Ti.
Ablation used a laser spot size of 30 microns, and a laser firing repetition rate of 10 Hz.
Activity of TiO2 for Ti-in-Zircon temperature calculation is 0.8.
[truncated: 38 more columns]
